# Supplementary material for: Growing New Corporate Businesses: From Initiation to Graduation
Source: Atypon-hosted journal article supplement (doi:10.1287/orsc.2016.1081), 2016-09-26
Supplement: orsc.2016.1081-sm.pdf [file orsc.2016.1081-sm.pdf]

**TABLE 2: ILLUSTRATIVE CASE EVIDENCE FOR THE EXPLORATION PHASE<sup>1</sup>**

| Exploratory initiative                | Developing distinct skillset                                                                                                                                                                                                                | Creating local identity                                                                                                                                                                                | Taking initiative                                                                                                                                                                                                               | Coalition building                                                                                                                                                                              |
|---------------------------------------|---------------------------------------------------------------------------------------------------------------------------------------------------------------------------------------------------------------------------------------------|--------------------------------------------------------------------------------------------------------------------------------------------------------------------------------------------------------|---------------------------------------------------------------------------------------------------------------------------------------------------------------------------------------------------------------------------------|-------------------------------------------------------------------------------------------------------------------------------------------------------------------------------------------------|
| <b>Coffee Caps</b><br>Transition case | ++<br>“The (core coffee unit) wanted to transfer some of their experts, but we preferred to hire external people who could bring in new skills.”* <sup>B</sup>                                                                              | ++<br>“In the early days, Coffee Caps was very different from FoodGroup. We felt like a start-up and FoodGroup did not matter at all in our activities.”* <sup>B</sup>                                 | +<br>“Customer tests provided the first evidence of the market potential. The Coffee Caps management used these results to gain corporate support.”** <sup>B</sup>                                                              | ++<br>“Our first CEO used his internal network to enlist a growing number of top management sponsors.”* <sup>B</sup>                                                                            |
| <b>Nutrition</b><br>Transition case   | ++<br>“At FoodGroup, we understood candy bars, but not sports nutrition. The nutrition unit bought a specialized company to obtain that expertise.”* <sup>A</sup>                                                                           | ++<br>“We increasingly became a pharmaceutical company. (...) If you are small it is important to develop your own identity.”* <sup>B</sup>                                                            | ++<br>“We experimented with value-added service concepts. (...) It gained us much interest and attention at the top management level.”* <sup>B</sup>                                                                            | ++<br>“Their CEO has 20 years’ experience at FoodCorp. He formed a team of corporate supporters.”* <sup>A</sup>                                                                                 |
| <b>Icon</b><br>Transition case        | ++<br>“Many of the new hires were luxury marketing experts (...) they brought expertise that we did not have at CarInc before.”* <sup>A</sup>                                                                                               | ++<br>“Our interest was Icon, that was where we belonged.”* <sup>B</sup><br>“Icon developed its own identity that set them apart from us.”* <sup>C</sup>                                               | ++<br>“The buzz created by the designs for the first model helped convince those colleagues in the senior team who remained skeptical about Icon.”* <sup>A</sup>                                                                | ++<br>“Without our CEO’s excellent headquarter contacts, we would not exist today. (...) He was relentless in ensuring that we got the support.”* <sup>B</sup>                                  |
| <b>Basket</b><br>Transition case      | ++<br>“We changed the hiring profile to obtain employees with retail expertise. (...) We did not want any more investment bankers.”* <sup>B</sup>                                                                                           | +<br>“Since we had to create an entirely new market segment, we needed a different mentality.”* <sup>B</sup>                                                                                           | ++<br>“In the early stages, there is much insecurity around a new venture. You need initiatives with immediate results to gain internal support.”* <sup>B</sup>                                                                 | ++<br>“I put a lot of effort into positioning Basket at BankCorp. (...) I enlisted strong supporters in the senior management team.”* <sup>B</sup>                                              |
| <b>Fleet</b><br>Non-transition case   | ++<br>“We hired 100 fleet experts who knew how to serve corporate customers.”* <sup>B</sup>                                                                                                                                                 | ++<br>“We adopted a multi-brand identity. (...) That is very different from CarInc, where everything is about their brand, their cars, their history.”* <sup>B</sup>                                   | +<br>“Fleet’s CEO presented the unit’s innovative service concepts to demonstrate its market potential (...), which actually convinced me to support them.”* <sup>A</sup>                                                       | ++<br>“I was constantly talking (to corporate team members) about Fleet. In the beginning, I had quite some success in enlisting them as our sponsors.”* <sup>B</sup>                           |
| <b>eBroker</b><br>Non-transition case | +/-<br>“We brought in some people with new skills in call center operations and IT platform development.”* <sup>B</sup><br>“From today’s perspective, we did not acquire any capabilities that were truly novel to the bank.”* <sup>B</sup> | --<br>“We had a separate unit, but since everybody came from BankCorp, it still felt like BankCorp.”* <sup>B</sup><br>“They had exactly the same processes and regulations as BankCorp.”* <sup>A</sup> | +/-<br>“eBroker’s CEO showed us their product concepts. It all sounded highly innovative and exciting.”* <sup>A</sup><br>“When everybody turned against us, presenting success stories became counterproductive.”* <sup>A</sup> | --<br>“We quickly lost our initial corporate support.”* <sup>B</sup><br>“Maybe we should have been more active. But we simply did not have the buy-in at the top that we needed.”* <sup>B</sup> |

<sup>1</sup> While the plus signs indicate supporting evidence, the minus signs indicate deviating evidence. A double sign indicates strong evidence, which means that a theme was present across all data sources. A single sign indicates moderate evidence, which means that a theme was indicated in at least three data sources. While a single asterisk denotes evidence from interview data, a double asterisk refers to archival sources. “A” denotes data from corporate sources, “B” from exploratory unit sources, and “C” from core unit sources.

**TABLE 3: ILLUSTRATIVE CASE EVIDENCE FOR THE TRANSITION PHASE<sup>1</sup>**

| Exploratory initiative | Clarifying the territories                                                                                                                                                                        | Identifying strategic complementarities                                                                                                                                                                                                          | Building a profile                                                                                                                                                                                                                             | Defending unit autonomy                                                                                                                                                                                                      |
|------------------------|---------------------------------------------------------------------------------------------------------------------------------------------------------------------------------------------------|--------------------------------------------------------------------------------------------------------------------------------------------------------------------------------------------------------------------------------------------------|------------------------------------------------------------------------------------------------------------------------------------------------------------------------------------------------------------------------------------------------|------------------------------------------------------------------------------------------------------------------------------------------------------------------------------------------------------------------------------|
| <b>Coffee Caps</b>     | ++                                                                                                                                                                                                | ++                                                                                                                                                                                                                                               | ++                                                                                                                                                                                                                                             | ++                                                                                                                                                                                                                           |
| Transition case        | “We (...) wrote down the elements differentiating us. We now have guidelines of our territories.”* <sup>C</sup>                                                                                   | “It was clear that only sharing assets in production would give us the scale to be competitive.”* <sup>B</sup>                                                                                                                                   | “Coffee Caps’ premium marketing skills were also valuable for other FoodGroup businesses.”* <sup>A</sup>                                                                                                                                       | “The new capabilities we had created were important for the group, which strengthened our position.”* <sup>B</sup>                                                                                                           |
| <b>Nutrition</b>       | ++                                                                                                                                                                                                | ++                                                                                                                                                                                                                                               | +                                                                                                                                                                                                                                              | +                                                                                                                                                                                                                            |
| Transition case        | “We negotiated agreements on shared and distinctive R&D capabilities.”* <sup>B</sup><br>“At that stage, the two units’ charters had become quite clear.”* <sup>C</sup>                            | “We needed the (core) food unit’s deep knowledge of manufacturing, market practices, and customers. (...) We could probably have built these assets ourselves, but never at the same cost.”* <sup>B</sup>                                        | “Nutrition contributes to Food Group’s much needed transformation from a food to a health and nutrition company. (...) They are the front-runner for our group’s renewal.”* <sup>A</sup>                                                       | “After tough negotiations Nutrition took control of the infant nutrition business.”* <sup>A</sup><br>“What helped us was the nutritional competence we had developed.”* <sup>B</sup>                                         |
| <b>Icon</b>            | ++                                                                                                                                                                                                | ++                                                                                                                                                                                                                                               | ++                                                                                                                                                                                                                                             | ++                                                                                                                                                                                                                           |
| Transition case        | “It was important to have clear dividing lines. We now know what separates us (...). Icon is about small series production and luxury marketing.”* <sup>C</sup>                                   | “While their cars are expensive, they would be priceless if they produced everything themselves.”* <sup>C</sup><br>“Icon’s skills in small series development and production could help us make our niche models more profitable.”* <sup>C</sup> | “It took us quite some effort to make them understand that we add a set of unique capabilities to the group.”* <sup>B</sup><br>“The corporate team finally agreed that Icon could develop a new, attractive segment for CarInc.”* <sup>C</sup> | “There were tentative efforts to appropriate our business. For nearly a year, we fought them off.”* <sup>B</sup><br>“What saved us from being absorbed was that we had become an important part of the group.”* <sup>B</sup> |
| <b>Basket</b>          | ++                                                                                                                                                                                                | ++                                                                                                                                                                                                                                               | ++                                                                                                                                                                                                                                             | ++                                                                                                                                                                                                                           |
| Transition case        | “We had several meetings to define the target customers and products, which was needed to reduce the tension between us.”* <sup>C</sup>                                                           | “We sat down and discussed the two units’ roles and how we can work together for our mutual benefit by combining our strengths.”* <sup>C</sup>                                                                                                   | “Basket had to prove that they would complement our portfolio. (...) We encouraged them to improve their relations with our other units.”* <sup>A</sup>                                                                                        | “There were several hostile takeover attempts. (...) Our senior team sponsors helped us fend off these attempts.”* <sup>B</sup>                                                                                              |
| <b>Fleet</b>           | --                                                                                                                                                                                                | --                                                                                                                                                                                                                                               | --                                                                                                                                                                                                                                             | --                                                                                                                                                                                                                           |
| Non-transition case    | “The CarInc guys made it very clear that they perceived us as a threat to their business.”* <sup>B</sup><br>“I personally never understood how Fleet fit into our group portfolio.”* <sup>C</sup> | “The two units did not talk about synergies.”* <sup>A</sup><br>“They were the disowned child (...) the odd man out that was never accepted. We never wanted to work with them.”* <sup>C</sup>                                                    | “It all looked good in the beginning. But Fleet never gained traction. Most of us lost confidence that Fleet could ever become a vital part of the CarInc group.”* <sup>A</sup>                                                                | “If you do not have excellent arguments against integration, you lose your autonomy. There was a gradual process of absorption to which we had no answer. We had to go along with it.”* <sup>B</sup>                         |
| <b>eBroker</b>         | --                                                                                                                                                                                                | --                                                                                                                                                                                                                                               | --                                                                                                                                                                                                                                             | --                                                                                                                                                                                                                           |
| Non-transition case    | “There were no differences. What they did was exactly what we did. (...) They were our direct rivals.”* <sup>C</sup>                                                                              | “We never really discussed shared activities.”* <sup>B</sup><br>“eBroker was our competitor, we did not support their operations.”* <sup>C</sup>                                                                                                 | “The belief that eBroker creates value for the group vanished over time.”* <sup>A</sup><br>“Online banking is attractive, but we may not need eBroker for it.”* <sup>A</sup>                                                                   | “If you fail to show how you could contribute to the group, there are no good arguments for defending your autonomy.”* <sup>B</sup>                                                                                          |

<sup>1</sup> While the plus signs indicate supporting evidence, the minus signs indicate deviating evidence. A double sign indicates strong evidence, which means that a theme was present across all data sources. A single sign indicates moderate evidence, which means that a theme was indicated in at least three data sources. While a single asterisk denotes evidence from interview data, a double asterisk refers to archival sources. “A” denotes data from corporate sources, “B” from exploratory unit sources, and “C” from core unit sources.

**TABLE 4: ILLUSTRATIVE CASE EVIDENCE FOR THE EXPLOITATION PHASE<sup>1</sup>**

| Exploratory initiative | Sharing resources                                                                                                                                                                                               | Developing collective identity                                                                                                                                                                                                       | Controlling strategic resources                                                                                                                                                                     | Negotiating decision-making authority                                                                                                                                  |
|------------------------|-----------------------------------------------------------------------------------------------------------------------------------------------------------------------------------------------------------------|--------------------------------------------------------------------------------------------------------------------------------------------------------------------------------------------------------------------------------------|-----------------------------------------------------------------------------------------------------------------------------------------------------------------------------------------------------|------------------------------------------------------------------------------------------------------------------------------------------------------------------------|
| <b>Coffee Caps</b>     | ++                                                                                                                                                                                                              | ++                                                                                                                                                                                                                                   | ++                                                                                                                                                                                                  | ++                                                                                                                                                                     |
| Transition case        | <p>“The two units share product development and production facilities.”**<sup>A</sup></p> <p>“Coffee Caps shared their new coffee roasting process with us.”*<sup>C</sup></p>                                   | <p>“We recognized that we all belong to FoodGroup (...), working together makes both businesses stronger.”*<sup>B</sup></p> <p>“We are now part of the same team.”*<sup>C</sup></p>                                                  | <p>“They created the Coffee Caps consumer club and (set up) the group’s first direct sales force.”**<sup>A</sup></p>                                                                                | <p>“We negotiated with the corporate team for greater autonomy.”*<sup>B</sup></p> <p>“Coffee Caps received full P&amp;L responsibility.”*<sup>B</sup></p>              |
| <b>Nutrition</b>       | ++                                                                                                                                                                                                              | ++                                                                                                                                                                                                                                   | ++                                                                                                                                                                                                  | ++                                                                                                                                                                     |
| Transition case        | <p>“Nutrition has 81 projects in our shared product development centers.”*<sup>C</sup></p> <p>“Nutrition enabled us to add nutritional value to our products.”*<sup>C</sup></p>                                 | <p>“We first had a separate culture, but today we stress that we are proud to be part of FoodGroup far more. That is normal when you are more established.”*<sup>B</sup></p>                                                         | <p>“We gained direct control of the R&amp;D. (...) We created a specialty sales force to be less dependent on FoodGroup’s retail sales force.”*<sup>B</sup></p>                                     | <p>“We persuaded the corporate team to change the decision rights (...) They gave us exactly the same status as the established business units.”*<sup>B</sup></p>      |
| <b>Icon</b>            | ++                                                                                                                                                                                                              | ++                                                                                                                                                                                                                                   | ++                                                                                                                                                                                                  | ++                                                                                                                                                                     |
| Transition case        | <p>“We share product development and production assets with the car unit.”*<sup>B</sup></p> <p>“We learned a lot from Icon about premium marketing.”*<sup>C</sup></p>                                           | <p>“We (now) feel far more part of the CarInc group.”*<sup>B</sup></p> <p>“Today we are good CarInc citizens.”*<sup>B</sup></p>                                                                                                      | <p>“Icon invested €100 million in its factory (...) and created a separate franchise sales network as well as showrooms around the world.”**<sup>A</sup></p>                                        | <p>“Our decision-making authority increased when our first model was launched.”*<sup>B</sup></p> <p>“We now have full P&amp;L responsibility.”*<sup>B</sup></p>        |
| <b>Basket</b>          | ++                                                                                                                                                                                                              | ++                                                                                                                                                                                                                                   | ++                                                                                                                                                                                                  | ++                                                                                                                                                                     |
| Transition case        | <p>“We collaborate (with the investment banking unit) regarding the back office and IT. This helped us to exploit our products more efficiently.”*<sup>B</sup></p>                                              | <p>“Working with the investment bank made us aware that we all belong together. (...) We still think we are the avant-garde ... but inside the group, not outside.”*<sup>B</sup></p>                                                 | <p>“Basket (...) invested in its own trading platform.”*<sup>A</sup></p> <p>“We set up a marketing team with state-of-the-art CRM expertise.”*<sup>B</sup></p>                                      | <p>“We used our first product’s huge market success to convince the corporate team to grant us greater decision rights.”*<sup>B</sup></p>                              |
| <b>Fleet</b>           | --                                                                                                                                                                                                              | --                                                                                                                                                                                                                                   | --                                                                                                                                                                                                  | -                                                                                                                                                                      |
| Non-transition case    | <p>“There was nearly no sharing of operational assets across the units.”*<sup>B</sup></p> <p>“We did not support Fleet in any way. After a while they gave up on us.”*<sup>C</sup></p>                          | <p>“CarInc’s culture cannot bear other car brands (...) we were the traitors.”*<sup>B</sup></p> <p>“I call them ‘fleet Rambos’ (...) My job is selling CarInc cars. I do not see how they could help me with this.”*<sup>C</sup></p> | <p>“We decided to centralize most of Fleet’s operational functions to better align them with the group. (...) They were obviously against this, but it was the right thing to do.”*<sup>A</sup></p> | <p>“We did not ask for greater authority. It was obvious that the corporate team wanted tighter control rather than granting us even more authority.”*<sup>B</sup></p> |
| <b>eBroker</b>         | --                                                                                                                                                                                                              | --                                                                                                                                                                                                                                   | --                                                                                                                                                                                                  | --                                                                                                                                                                     |
| Non-transition case    | <p>“The only ‘transfer’ – if you want to call it that – was that the core units hired our people away.”*<sup>B</sup></p> <p>“Why should we share assets with them? That was not our interest.”*<sup>C</sup></p> | <p>“The two units’ interests were directly opposed (...), they did not want to be part of the same camp.”*<sup>A</sup></p> <p>“It was us against them. There was never a ‘we.’ We were BankCorp, not them.”*<sup>C</sup></p>         | <p>“We had some call center and back office resources, but they are now integrated into BankCorp’s corporate support services. There was not much we could do about this.”*<sup>B</sup></p>         | <p>“We lost our authority (...) our services are now fully integrated into BankCorp’s service portfolio.”*<sup>A</sup></p>                                             |

<sup>1</sup> While the plus signs indicate supporting evidence, the minus signs indicate deviating evidence. A double sign indicates strong evidence, which means that a theme was present across all data sources. A single sign indicates moderate evidence, which means that a theme was indicated in at least three data sources. While a single asterisk denotes evidence from interview data, a double asterisk refers to archival sources. “A” denotes data from corporate sources, “B” from exploratory unit sources, and “C” from core unit sources.
